# Supplementary figures and images for: Differences in the epigenetic and reprogramming properties of pluripotent and extra-embryonic stem cells implicate chromatin remodelling as an important early event in the developing mouse embryo
Source: Springer Nature journal article supplement (doi:10.1186/1756-8935-3-1), 2010-01-12

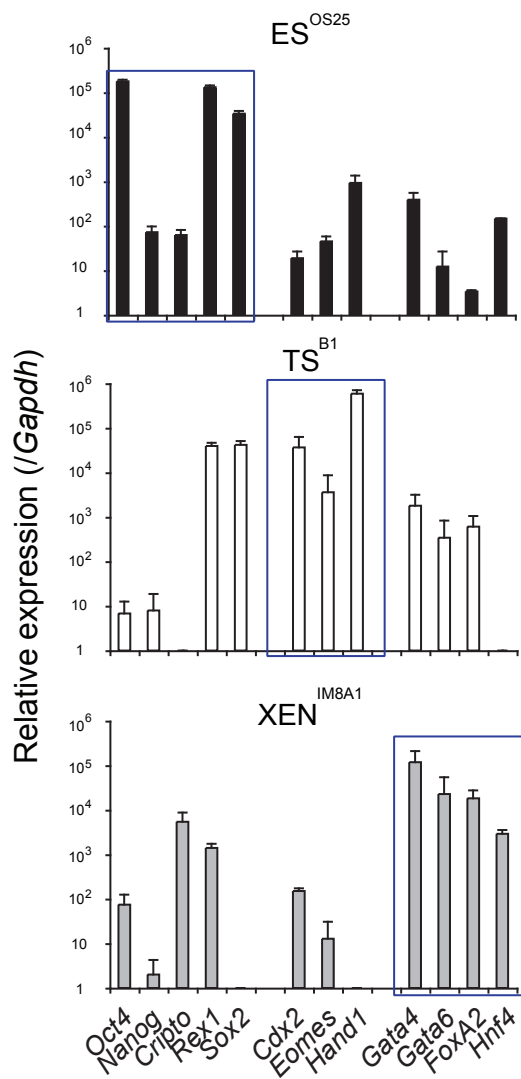

Supplement: Additional file 4 [file 1756-8935-3-1-s4.pdf]
